# Supplementary material for: vhp Is a Fibrinogen-Binding Protein Related to vWbp in Staphylococcus aureus
Source: PubMed Central journal article supplement (PMC8406236; doi:10.1128/mbio.01167-21), 2021-08-03
Supplement: mbio.01167-21-sf001.pdf [file mbio.01167-21-sf001.pdf]

**Fig S1A Sequence alignment of Vhp isoforms**

```

CAI80435.1 -----MKRKVLVLTMGVICATQLWHSNHANALV 28
ANI73772.1 -----MKRKVLVLTMGVICATQLWHSNHANALV 28
AGO29166.1 -----MKRKVLVLTMGVICATQLWHSNHANALV 28
ADL22693.1 -----MKRKVLVLTMGVICATQLWHPNHANALV 28
CCG15434.1 -----MKRKVLVLTMGVLCATQLWHSNHANALV 28
ADI97346.1 -----MKRKVLVLTMGVICATQLWHSNHANALV 28
BAB94633.1 -----MKRKVLVLTMGVICATQLWHSNHANALV 28
AGU60934.1 -----MKRKVLVLTMGVICATQLWHSNHANALV 28
AMV84570.1 -----MKRKVLVLTMGVICATQLWHSNHANALV 28
BAB41978.1 -----MKRKVLVLTMGVICATQLWHSNHANALV 28
BAF77693.1 -----MKRKVLVLTMGVICATQLWHSNHANALV 28
ABR51687.1 -----MKRKVLVLTMGVICATQLWHSNHANALV 28
ADC36980.1 -----MKRKVLVLTMGVICATQLWHSNHANALV 28
AQD18902.1 -----MKRKVLVLTMGVICATQLWHSNHANALV 28
CCJ10585.1 -----MKRKVLVLTMGVICATQLWHSNHANALV 28
CAG39854.1 -----MKRKVLVLTMGVLCATQLWQTNNAKALV 28
ADQ77850.1 -----MKRKVLVLTMGVLCATQLWQTNNAKALV 28
AIO20462.1 -----MKRKVLVLTMGVLCATQLWQTNNAKALV 28
CRL33498.1 -----MKRKVLVLTMGVICATQLWHSNHANALV 28
AFH69102.1 MFLKYWYIIFNGEENRVKKSVFKSKQIRELKQLKRRKVLVLTMGVLCATQLWQTNNAKALV 60
ABD29944.1 -----MKRKVLVLTMGVICATQLWHSNHANALV 28
AEW64856.1 -----MKRKVLVLTMGVICATQLWHSNHANALV 28
ABD21761.1 -----MKRKVLVLTMGVICATQLWHSNHANALV 28
AAW36414.1 -----MKRKVLVLTMGVICATQLWHSNHANALV 28
ELP41198.1 -----MKRKVLVLTMGVICATQLWHSNHANALV 28
EJE56573.1 -----MGVICATQLWHSNHANALV 19
CBI48744.1 -----MKRKVLVLTMGVICATQLWHSNHANALV 28
AEV77849.1 -----MKRKVLVLTMGIIICATQLWHSNHVNALV 28
ALQ99050.1 -----MKRKVLVLTMGIIICATQLWHSNHVNALV 28
AGU54604.1 -----MKRKVLVLTMGIIICATQLWHSNHVNALV 28
**::*****: *:::***

```

```

CAI80435.1 TES IETNFVVKDS DNKNILQTHTEITTEEKFSIVEKSQLN----- 68
ANI73772.1 TESVETNFVVKDS DNKNILQTHSEITTEEKFSIVEKSQLN----- 68
AGO29166.1 TESVETNFVVKDS DNKNFLQTHTEITTEEKFSIVEKSQLN----- 68
ADL22693.1 TES IETNFVVKDS DNKNILQTHTEITTEEKFSIVEKSQLN----- 68
CCG15434.1 TESVETNFVVKDS GNNNLLQTHTEITTEEKFSIVEKSQLN----- 68
ADI97346.1 TESVETNFVVKDS DNENVLQTHTEITTEEKFSIVEKSQLN----- 68
BAB94633.1 SESVETNFVVKDS DNKNILQTHTEITTEEKFSVVEKSQLN----- 68
AGU60934.1 TESVETNFVVKDS DNKNILQTHTEITTEEKFSVVEKSQLN----- 68
AMV84570.1 TESVETNFVVKDS DNKNILQTHTEITTEEKFSVVEKSQLN----- 68
BAB41978.1 TESVETNFVVKDS DNKNILQTHTEITTEEKFSIVEKSQLN----- 68
BAF77693.1 TESVETNFVVKDS DNKNILQTHTEITTEEKFSIVEKSQLN----- 68
ABR51687.1 TESVETNFVVKDS DNKNILQTHTEITTEEKFSIVEKSQLN----- 68
ADC36980.1 TESVETNFVVKDS DNKNILQTHTEITTEEKFSIVEKSQLN----- 68
AQD18902.1 TESVETNFVVKDS DNKNILQTHTEITTEEKFSIVEKSQLN----- 68
CCJ10585.1 TESVETNFVVKDS DNKNILQTHTEITTEEKFSIVEKSQLN----- 68
CAG39854.1 T E S G V N D ----- T K Q F T E V T S E E K V I K D A I S K V N E S F I Y P Q N D L K G L G G E H N D 77
ADQ77850.1 T E S G V N D ----- T K Q F T E V T S E E K V I K D A I S K V N E S F I Y P Q N D L K G L G G E H N D 77
AIO20462.1 T E S G V N D ----- T K Q F T E V T S E E K V I K D A I S K V N E S F I Y P Q N D L K G L G G E H N D 77
CRL33498.1 T E S G A Y D ----- T K Q F T E I V S E E K V I K D S I S K V N E S F I Y P Q N D L K G L G G E H N D 77
AFH69102.1 H E S G V N D ----- T K Q F T E V T S E E K V I T V E H A Y I N ----- 89
ABD29944.1 T E S G A N D ----- T K Q F T E I V S E E K V I T V E H A Q I N ----- 57
AEW64856.1 T E S G A N D ----- T K Q F T E I V S E E K V I T V E H A Q I N ----- 57
ABD21761.1 T E S G A N D ----- T K Q F T E I V S E E K V I T V E H A Q I N ----- 57
AAW36414.1 T E S G A N D ----- T K Q F T E I V S E E K V I T V E H A Q I N ----- 57
ELP41198.1 T E S G A N D ----- T K Q F T E I V S E E K V I T V E H A Q I N ----- 57
EJE56573.1 T E S G A N D ----- T K Q F T E I V S E E K V I T V E H A Q I N ----- 48
CBI48744.1 T E S G A N D ----- T K Q F T E I V S E E K V I T V E H A Q I N ----- 57

```



|            |                                                          |     |
|------------|----------------------------------------------------------|-----|
| CBI48744.1 | <u>VENYKDTQSADARMKAKQKVNTLSKPHQNYFNKQIDKVYNGLQR</u> ---- | 156 |
| AEV77849.1 | <u>VENYKDTQSADARMKAKQKVNTLSKPHQNYFNKQIDKVYNGLQR</u> ---- | 156 |
| ALQ99050.1 | <u>VENYKDTQSADARMKAKQKVNTLSKPHQNYFNKQIDKVYNGLQR</u> ---- | 156 |
| AGU54604.1 | -----                                                    | 112 |

**Fig S1B. Sequence alignment of vWbp isoforms**

```

AMV79382.1 MKNKLLVLSL GALCVS QIWESNRASAVVSGEKNPYVSKALSVSGQKSNNSLEQYKESLN 60
AFH69100.1 MKNKLLVLSL GALCVS QIWESNRASAVVSGEKNPYVSESLKLNNDNKSLSLEKYKESLR 60
AMV84568.1 MKNKLLVLSL GALCVS QIWESNRASAVVSGEKNPYVSESLKLNNDNKSLSLSLEKYKESLR 60
CRL33493.1 MKNKLLVLSL GALCVS QIWESNRASAVVSGEENPYVSESLKLNNDNKSLSLSLEKYKESLR 60
ANI73770.1 MKNKLLVLSL GALCVS QIWESNRASAVVSGEENPYVSKALSVSGQKSNNTLTKQYKDSL 60
EJE56571.1 MKNKLLVLSL GALCVS QIWESNRASAVVSGEKNPYVSKALS IKGQKTNSWNLGQYKDSL 60
CAI80433.1 MKNKLLVLSL GALCVS QIWESNRASAVVSGEENPYVSKALS IKGQKTNSWNLGQYKDSL 60
CCG15432.1 MKNKLLVLSL GALCVS QIWESNRASAVVSGEKNPYVSKALS IKGQKTNSWNLGQYKDSL 60
AEV77847.2 MKNKLLVLSL GALCVS QIWESNRASAVVSGEENPYVSKALSVSGQKSNNTLTKQYKDSL 60
ALQ99048.1 MKNKLLVLSL GALCVS QIWESNRASAVVSGEENPYVSKALSVSGQKSNNTLTKQYKDSL 60
BAF77691.1 MKNKLLVLSL GALCVS QIWESNRASAVVSGEKNPYVSKALELKDKNKSNKSNYENYRDSLE 60
AQD18904.1 MKNKLLVLSL GALCVS QIWESNRASAVVSGEKNPYVSKALELKDKNKSNKSNYENYRDSLE 60
ABR51685.1 MKNKLLVLSL GALCVS QIWESNRASAVVSGEKNPYVSKALELKDKNKSNKSNYENYRDSLE 60
ADC36978.1 MKNKLLVLSL GALCVS QIWESNRASAVVSGEKNPYVSKALELKDKNKSNKSNYENYRDSLE 60
CCJ10583.1 MKNKLLVLSL GALCVS QIWESNRASAVVSGEKNPYVSKALELKDKNKSNKSNYENYRDSLE 60
ADI97344.1 MKNKLLVLSL GALCVS QIWESNRASAVVSGEKNPYVSKALELKGTSNKSNYENYRESLE 60
ABD20992.1 MKNKLLVLSL GALCVS QIWESNRASAVVSGEKNPYVSESLKLTNNKNKSRVVEEYKKS LD 60
CBI48742.1 MKNKLLVLSL GALCVS QIWESNRASAVVSGEKNPYVSESLKLTNNKNKSRVVEEYKKS LD 60
AAW36412.1 MKNKLLVLSL GALCVS QIWESNRASAVVSGEKNPYVSESLKLTNNKNKSRVVEEYKKS LD 60
ELP41199.1 MKNKLLVLSL GALCVS QIWESNRASAVVSGEKNPYVSESLKLTNNKNKSRVVEEYKKS LD 60
AGO29164.1 MKNKLLVLSL GALCVS QIWESNRASAVVSGEKNPYVSESLKLTGSKSTGVT PAMYKENLE 60
ADQ77852.1 MKNKLLVLSL GALCVS QIWESNRASAVVSGEENPYKSESLKLNKGRSTTITSDKYEENLD 60
AIO20460.1 MKNKLLVLSL GALCVS QIWESNRASAVVSGEENPYKSESLKLNKGRSTTITSDKYEENLD 60
AEW64854.1 MKNKLLVLSL GALCVS QIWESNRASAVVSGEENPYKSESLKLNKGRSTTITSDKYEENLD 60
AGU54602.1 MKNKLLVLSL GALCVS QIWEYNRASAVVSGEKNPYKSESLKLTGKRNSVTPVMYKENLE 60
ADL22691.1 MKNKLLVLSL GALCVS QIWESNRASAVVSGEKNPYVSESLKLTGSKSTVVT PAMYKENLE 60
***** * :***** :*** * :* :. . . . * . . . *

AMV79382.1 KLITSIDIQDHDGYDELEYKDINEKYQKKFLAEIDALNKFI DEERKIAYYSKN--NIQIP 118
AFH69100.1 SIMCTKEINKNDGYDEPEYKEALD TYRKKLFAELDALNKFLDEERKIASYIKK--NMEVP 118
AMV84568.1 SIMCTKEINKNDGYDEPEYKEALN TYRKKLFAELDALNKFLDEERKIASYIKK--NMEVP 118
CRL33493.1 SIMCTSEINKNDGYDEPEYKEAMDTYRKKLFAELDALNKFLDEERKIASYIKK--NMEVP 118
ANI73770.1 SVMCTSEINKNDGYDEPEYKEAMDTYRKKLFAELDALNKFLDEERTITIKKKS--NENVS 118
EJE56571.1 TVMCTSEINKNDGYDEPEYKEAMDTYRKKLFAELDALNKFLDEERKIESSKKN--NNQVA 118
CAI80433.1 TVMCTSEINKNDGYDEPEYKEAMDTYRKKLFAELDALNKFLDEERKIESSKKN--NNQVP 118
CCG15432.1 TVMCTSEINKNDGYDEPEYKEAMDTYRKKLFAELDALNKFLDEERKIESSKKN--NNQVA 118
AEV77847.2 SVMCTSEINKNDGYDEPEYKEAMDTYRKKLFAELDALNKFLDEERKIESSKKN--NNQVP 118
ALQ99048.1 SVMCTSEINKNDGYDEPEYKEAMDTYRKKLFAELDALNKFLDEERKIESSKKN--NNQVP 118
BAF77691.1 SLISSLSFADYEKYEEPEYKAVK KYQQKFMAEDDALKNFLNEEKKIKNADI----SRKS 116
AQD18904.1 SLISSLSFADYEKYEEPEYKAVK KYQQKFMAEDDALKNFLNEEKKIKNADI----SRKS 116
ABR51685.1 SLISSLSFADYEKYEEPEYKAVK KYQQKFMAEDDALKNFLNEEKKIKNADI----SRKS 116
ADC36978.1 SLISSLSFADYEKYEEPEYKAVK KYQQKFMAEDDALKNFLNEEKKIKNADI----SRKS 116
CCJ10583.1 SLISSLSFADYEKYEEPEYKAVK KYQQKFMAEDDALKNFLNEEKKIKNADI----SRKS 116
ADI97344.1 NLI FLSL FADYEKYEEPEYNAV KKYQQKFMAEDDALKTF LSEKKLEKTD S----SRNS 116
ABD20992.1 DLIWSFPNLDNERFDNPEYKEAMK KYQQRFMAEDEALKKFFSEEKKIKNGN-----TDN 114
CBI48742.1 DLIWSFPNLDNERFDNPEYKEAMK KYQQRFMAEDEALKKFFSEEKKIKNGN-----TDN 114
AAW36412.1 DLIWSFPNLDNERFDNPEYKEAMK KYQQRFMAEDEALKKFFSEEKKIKNGN-----TDN 114
ELP41199.1 DLIWSFPNLDNERFDNPEYKEAMK KYQQRFMAEDEALKKFFSEEKKIKNGN-----TDN 114
AGO29164.1 SLISSLSFADYEKYEEPEYKEAVK KYQQKFMAEDDALKKFFSEEKKIKNRNTNT-----NT 116
ADQ77852.1 MLISSLSFADYEKYEEPEYKEAVK KYQQKFMAEDDALKKFFSEEKKIKNRNT-----NT 114
AIO20460.1 MLISSLSFADYEKYEEPEYKEAVK KYQQKFMAEDDALKKFFSEEKKIKNRNT-----NT 114
AEW64854.1 MLISSLSFADYEKYEEPEYKEAVK KYQQKFMAEDDALKKFFSEEKKIKNRNTNTNTNTNT 120
AGU54602.1 KLIASLSFADYEKYEEPEYKEAVK TYQQKFMAEDAALKKFFFREEKHIKE-----NTNT 113
ADL22691.1 SLISSLSFADYEKYEEPEFKDVVK KYQQRFMAEDAALKKFFFREEYFIKE-----NKNS 113
: : . : : : * : . . * : : : * * * : * : * :

AMV79382.1 ADILGLTHERYLKIYESLQENKKEFDIESKKIEEKHP ELKRYGNEEYQANVKLNELENK 178
AFH69100.1 SNILGLTHGRYTAIYNAIKENKKEFEKNVENIESKHLDLKRFDEDKDYEARVKLNELENK 178
AMV84568.1 SNILGLTHGRYTAIYNAIKENKKEFEKNVEKIESKHLDLKRFDEDKDYEARVKLNELENK 178
CRL33493.1 SNILGLTHGRYTAIYNAIKENKKEFEKNVENIESKHLDLKRFDEDKDYEARVKLNELENK 178
ANI73770.1 EDILGLTHQRYAAIHQGIKDNKA EFEKKVESIENKYS DLKKFDEVKDKVRDELNELENK 178

```



ABR51685.1 KKIQQERPESIPALTSEKN--HNQTMALKLKADTEAAKNDVSK---RSKRSLNTQNNKST 291  
ADC36978.1 KKIQQERPESIPALTSEKN--HNQTMALKLKADTEAAKNDVSK---RSKRSLNTQNNKST 291  
CCJ10583.1 KKIQQERPESIPALTSEKN--HNQTMALKLKADTEAAKNDVSK---RSKRSLNTQNNKST 291  
ADI97344.1 KEIKQERPENIPALTSKDN--HNQSMALKLKSDTEAAKTDVSK---RSKRSLNSQYKYST 291  
ABD20992.1 SDIDKTRPNNIPVLEDEKQEENHKNMAQLKSDTEAAKSDESKRSKRSLNTQNHKPA 294  
CBI48742.1 SDIDKTRPNNIPVLEDEKQEENHKNMAQLKSDTEAAKSDESKRSKRSLNTQNHKPA 294  
AAW36412.1 SDIDKTRPNNIPVLEDEKQEENHKNMAQLKSDTEAAKSDESKRSKRSLNTQNHKPA 294  
ELP41199.1 SDIDKTRPNNIPVLEDEKQEENHKNMAQLKSDTEAAKSDESKRSKRSLNTQNHKPA 294  
AGO29164.1 GEIGQQRPTS IPTLAPKEEKETNTNNANKLKSDETEAAKNDKTRSKRSKRSLNTHNHKSA 296  
ADQ77852.1 GEIGQQRPTS IPTLAPKEEKETNIKANKLKSDETEAAKNDKTRSKRSKRSLNTHNHKSA 288  
AIO20460.1 GEIGQQRPTS IPTLAPKEEKETNIKANKLKSDETEAAKNDKTRSKRSKRSLNTHNHKSA 288  
AEW64854.1 GEIGQQRPTS IPTLAPKEEKETNTNNANKLYDTEAAKTDKTRSKRSKRSLNTHNHKSA 300  
AGU54602.1 EEIGKQRP INIPTLASEKEKETNAKNANKLRADTEDAINDENKRCNRSKRSKRSLNTQNHKPA 292  
ADL22691.1 EEINKERPKDIPVLSEYEH--ENKEKAITLKSDETEAAKNDKTRSKRSKRSLNTQNHKSA 290  
. \* : \*\* . \* \* : \* \* : \* \* \* \* : \* \* \* \* \* :

AMV79382.1 INEVTEEQKANYEKKFKEIKERFLAKQKYKNNTPVVSLYEDEDN-----ENDKQLVVA 347  
AFH69100.1 INEVTAEQKAEYERKAEERKEKFLAKNK---DNPVVS LI DDEDDN---ENENDKQLVVA 349  
AMV84568.1 SQEVTAEQKAEYERKAEERKEKFLAKNK---DNPVVS LI DDEDDN-----ENDKQLVVA 347  
CRL33493.1 SREVTAEQKAEYERKAEERKEKFLAKNK---DNPVVS LI DDEDDN-----ENDKQLVVA 344  
ANI73770.1 SQEVTAEQKAEYERKAEERKEKFLAKNK---DNPVVS LI DDEDDN-----ENDKQLVVA 347  
EJE56571.1 SQEVTAEQKAEYERKAEERKEKFLAKNK---DNPVVS LI DDEDDN-----ENDKQLVVA 344  
CAI80433.1 SQEVSEQQKAEYERKAEERKEKFLAKNK---DNPVVS LI DDEDDN-----ENDKQLVVA 344  
CCG15432.1 INEVTEEQKANYEKKFKEIKERFLAKQKKNNTPVVSLYEDEDN-----ENDKQLVVA 347  
AEV77847.2 INEVTEEQKANYEKKFKEIKERFLAKQKKNNTPVVSLYEDEDN-----ENDKQLVVA 347  
ALQ99048.1 INEVTEEQKANYEKKFKEIKERFLAKQKKNNTPVVSLYEDEDN-----ENDKQLVVA 347  
BAF77691.1 TQEISEEQKAEYQKSEALKERFINRQKSK-NESVVS LI DDED-----DNENDRQLVVA 345  
AQD18904.1 TQEISEEQKAEYQKSEALKERFINRQKSK-NESVVS LI DDED-----DNENDRQLVVA 345  
ABR51685.1 TQEISEEQKAEYQKSEALKERFINRQKSK-NESVVS LI DDED-----DNENDRQLVVA 345  
ADC36978.1 TQEISEEQKAEYQKSEALKERFINRQKSK-NESVVS LI DDED-----DNENDRQLVVA 345  
CCJ10583.1 TQEISEEQKAEYQKSEALKERFINRQKSK-NESVVS LI DDED-----DNENDRQLVVA 345  
ADI97344.1 SKEVSEQQKADYERKAEERKARFLDRQKSK-KEPVVSLYEYDFEHKQRFNANEKQLVVA 350  
ABD20992.1 SQEVSEQQKAEYDKRAEERKARFLDNQKIK-KTPVVS LEYDFEHKQRIDNENDKQLVVA 353  
CBI48742.1 SQEVSEQQKAEYDKRAEERKARFLDNQKIK-KTPVVS LEYDFEHKQRIDNENDKQLVVA 353  
AAW36412.1 SQEVSEQQKAEYDKRAEERKARFLDNQKIK-KTPVVS LEYDFEHKQRIDNENDKQLVVA 353  
ELP41199.1 SQEVSEQQKAEYDKRAEERKARFLDNQKIK-KTPVVS LEYDFEHKQRIDNENDKQLVVA 353  
AGO29164.1 SQEVTAEQKADYERKAEERKARFLDRQKSK-KEPVVSLYEYDFEHKQRVDNANDKQLVVA 355  
ADQ77852.1 SKEVSEQQKADYERKAEERKARFLDRQKSK-KTPVVS LEYDFEHKQRVDNENDKQLVVA 347  
AIO20460.1 SQEVSEQQKADYERKAEERKARFLDRQKSK-KTPVVS LEYDFEHKQRVDNENDKQLVVA 347  
AEW64854.1 SKEVTAEQKAEYKRAEERKARFLDRQKSK-KEPVVSLYEYDFEHKQRFNANEKQLVVA 359  
AGU54602.1 SQEVSEQQKADYERKAEERKARFLDRQKSK-QTPVVS LEYDFEHKQRVDNANDKQLVVA 351  
ADL22691.1 SQEVSEQQKAEYKRAEERKARFLDRQKSK-QTPLMS LEYDFEHKQRVDNENDKQLVVA 349  
. \* : \* \* \* : \* \* : \* \* : \* \* : \* \* : \* \* : \* \* : \* \* : \* \* : \* \* : \* \* :

AMV79382.1 PSKKPTTPTTYTETTTQVPMPPTVERQTQQQIIYNAPKQLAGLNGESHDFTTTHQSPTTSN 407  
AFH69100.1 PTNKPTTLPPTYTETTTQVPMPPTVERQTQQQIVYKAPKPLAGLNGESHDFTTTHQSPTTSN 409  
AMV84568.1 PTKKPTTPTTYTETTTQVPMPPTVERQTQQQIIYNAPKQLAGLNGESHDFTTTHQSPTTSN 407  
CRL33493.1 PSKKPTTPTTYTETTTQVPMPPTVERQTQQQIIYNAPKQLAGLNGESHDFTTTHQSPTTSN 404  
ANI73770.1 PTKKPTTPTTYTETTTQVPMPPTVERQTQQQIVYKTPKPLARLNGESHDFTTTHQSPTTSN 407  
EJE56571.1 PTKKPTTPTTYTETTTQVPMPPTVERQTQQQIIYNAPKQLAGLNGESHDFTTTHQSPTTSN 404  
CAI80433.1 PTKKPTTPTTYTETTTQVPMPPTVERQTQQQIIYNTPKQLAGLNGESHDFTTTHQSPTTSN 404  
CCG15432.1 PSKKPTTPTTYTETTTQVPMPPTVERQTQQQIIYNAPKQLAGLNGESHDFTTTHQSPTTSN 407  
AEV77847.2 PTKKPTTPTTYTETMTQVPMPPTVERQAHQQIVYKAPKQLAGLNGESHDFTTTHQSPTTSN 407  
ALQ99048.1 PTKKPTTPTTYTETMTQVPMPPTVERQAHQQIVYKAPKQLAGLNGESHDFTTTHQSPTTSN 407  
BAF77691.1 PSKKPTTPTTYTETTTQVPMPPTVERQTQQQIVYKTPKPLAGLNGESHDFTTTHQSPTTSN 405  
AQD18904.1 PSKKPTTPTTYTETTTQVPMPPTVERQTQQQIVYKTPKPLAGLNGESHDFTTTHQSPTTSN 405  
ABR51685.1 PSKKPTTPTTYTETTTQVPMPPTVERQTQQQIVYKTPKPLAGLNGESHDFTTTHQSPTTSN 405  
ADC36978.1 PSKKPTTPTTYTETTTQVPMPPTVERQTQQQIVYKTPKPLAGLNGESHDFTTTHQSPTTSN 405  
CCJ10583.1 PSKKPTTPTTYTETTTQVPMPPTVERQTQQQIVYKTPKPLAGLNGESHDFTTTHQSPTTSN 405  
ADI97344.1 PTKKPT-PPTYTETTTQVPMPPTVERQTQEQIVYKAPKQLAGLNGESHDFSTTHQTPTTSN 409  
ABD20992.1 PTKKPTTPTTYTETTTQVPMPPTVERQTQQQIIYNAPKQLAGLNGESHDFTTTHQSPTTSN 413  
CBI48742.1 PTKKPTTPTTYTETTTQVPMPPTVERQTQQQIIYNAPKQLAGLNGESHDFTTTHQSPTTSN 413  
AAW36412.1 PTKKPTTPTTYTETTTQVPMPPTVERQTQQQIIYNAPKQLAGLNGESHDFTTTHQSPTTSN 413

ELP41199.1 PTKKPTSPTTYTETTTQVPMPTVERQTQQQIIYNAPKQLAGLNGESHDFTTTHQSPTTSN 413  
AGO29164.1 PTKKPTLP-TYTETTTQVPMPTVERQTQEQIVYKAPKQLAGLNGESHNFSTTHQTPIITSN 414  
ADQ77852.1 PSKKPTTPTTYTETTTQLPMPTVERQTQQQIVYKAPKPLAGLNGESHDFTTTHQSPTTSN 407  
AIO20460.1 PSKKPTTPTTYTETTTQLPMPTVERQTQQQIVYKAPKPLAGLNGESHDFTTTHQSPTTSN 407  
AEW64854.1 PTKKPTTPTTYTETTTQVPMPTVERQTQQQIVYKTPKPLVGLNGESHDFTTTHQSPTTSN 419  
AGU54602.1 PTKKPTSPTSYPYETTTQVPMPTVERQTQQQIVYKAPKQLAGLNGESHDFTTTHQSPTTSN 411  
ADL22691.1 PTKKPTTPTTYTETTTQVPMPTVERQAOQQQIVYKTPKPLAGLNGESHDFTTTHQSPTTSN 409  
\*::\*\*\* :\*\*\*\* \*\* \*\*\*:\*\*\*\*\*::\*:\*\*::\*\* \* . \*\*\*\*\*:\*:\*\*\*\*\*: \*\*\*

AMV79382.1 HTHNNHIEFEETSALPGRKSGSLVGLISQIDSSHLTEREKRVIKREHVREAQKLVLDNYKDT 467  
AFH69100.1 HTHNNHIEIEETSALPSRKTGSLVGLSQIDSSHLTEREKRVIKREHVREAQKLVLDNYKDT 469  
AMV84568.1 HTHNNVFEFEETSALPGRKSGSLVGLISQIDSSHLTEREKRVIKREHVREAQKLVLDNYKDT 467  
CRL33493.1 HTHNNHIEFEETSALPGRKSGSLVGLISQIDSSHLTEREKRVIKREHVREAQKLVLDNYKDT 464  
ANI73770.1 HTHNNVFEFEETSALPGRKSGSLVGLISQIDSSHLTEREKRVIKREHVREAQKLVLDNYKDT 467  
EJE56571.1 HTHNNVFEFEETSALPGRKSGSLVGLISQIDSSHLTEREKRVIKREHVREAQKLVLDNYKDT 464  
CAI80433.1 HTHNNVFEFEETSALPGRKSGSLVGLISQIDSSHLTEREKRVIKREHVREAQKLVLDNYKDT 464  
CCG15432.1 HTHNNHIEFEETSALPGRKSGSLVGLISQIDSSHLTEREKRVIKREHVREAQKLVLDNYKDT 467  
AEV77847.2 HTHNNVFEFEETSALPGRKSGSLVGLISQIDSSHLTEREKRVIKREHVREAQKLVLDNYKDT 467  
ALQ99048.1 HTHNNVFEFEETSALPGRKSGSLVGLISQIDSSHLTEREKRVIKREHVREAQKLVLDNYKDT 467  
BAF77691.1 HTHNNVFEFEETSALPGRKSGSLVGLISQIDSSHLTEREKRVIKREHVREAQKLVLDNYKDT 465  
AQD18904.1 HTHNNVFEFEETSALPGRKSGSLVGLISQIDSSHLTEREKRVIKREHVREAQKLVLDNYKDT 465  
ABR51685.1 HTHNNVFEFEETSALPGRKSGSLVGLISQIDSSHLTEREKRVIKREHVREAQKLVLDNYKDT 465  
ADC36978.1 HTHNNVFEFEETSALPGRKSGSLVGLISQIDSSHLTEREKRVIKREHVREAQKLVLDNYKDT 465  
CCJ10583.1 HTHNNVFEFEETSALPGRKSGSLVGLISQIDSSHLTEREKRVIKREHVREAQKLVLDNYKDT 465  
ADI97344.1 HTHNNVFEFEETSALPGRKTGSLVGLSQIDSSHLTEREKRVIKREHVREAQKLVLDNYKDT 469  
ABD20992.1 HTHNNVFEFEETSALPGRKSGSLVGLISQIDSSHLTEREKRVIKREHVREAQKLVLDNYKDT 473  
CBI48742.1 HTHNNVFEFEETSALPGRKSGSLVGLISQIDSSHLTEREKRVIKREHVREAQKLVLDNYKDT 473  
AAW36412.1 HTHNNVFEFEETSALPGRKSGSLVGLISQIDSSHLTEREKRVIKREHVREAQKLVLDNYKDT 473  
ELP41199.1 HTHNNVFEFEETSALPGRKSGSLVGLISQIDSSHLTEREKRVIKREHVREAQKLVLDNYKDT 473  
AGO29164.1 HTHNNVFEFEETSALPGRKTGSLVGLSQIDSSHLTEREKRVIKREHVREAQKLVLDNYKDT 474  
ADQ77852.1 HTHNNHIEIEETSALPGRKTGSLVGLSQIDSSHLTEREKRVIKREHVREAQKLVLDNYKDT 467  
AIO20460.1 HTHNNHIEIEETSALPGRKTGSLVGLSQIDSSHLTEREKRVIKREHVREAQKLVLDNYKDT 467  
AEW64854.1 HTHNNVFEFEETSALPGRKSGSLVGLISQIDSSHLTEREKRVIKREHVREAQKLVLDNYKDT 479  
AGU54602.1 NTHNNHIEFEETSALPGRKSGSLVGLISQIDSSHLTEREKRVIKREHVREAQKLVLDNYKDT 471  
ADL22691.1 HTHNNVFEFEETSALPGRKSGSLVGLSQIDSSHLTEREKRVIKREHVREAQKLVLDNYKDT 469  
:\*.:::\*.:::\*\*\*\*\*.\*\*:\*\*\*\*\*:\*\*\*\*\*:\*\*\*\*\*:\*\*\*\*\*:\*\*\*\*\*:\*\*\*\*\*

AMV79382.1 HSYKDRNLNAQQKVNTLSEGHQKRFNKQINKVYNGK 502  
AFH69100.1 HSYKDRNLNAQQKVNTLSAGHQKRFNKQINKVYNGK 504  
AMV84568.1 HSYKDRNLNAQQKVNTLSEGHQKRFNKQIDKVYNGK 502  
CRL33493.1 HSYKDRNLNAQQKVNTLSEGHQKRFNKQINKVYNGK 499  
ANI73770.1 HSYKDRNLNAQQKVNTLSEGHQKRFNKQIDKVYNGK 502  
EJE56571.1 HSYKDRNLNAQQKVNTLSEGHQKRFNKQINKVYNGK 499  
CAI80433.1 HSYKDRNLNAQQKVNTLSEGHQKRFNKQINKVYNGK 499  
CCG15432.1 HSYKDRNLNAQQKVNTLSEGHQKRFNKQINKVYNGK 502  
AEV77847.2 HSYKDRNLNAQQKVNTLSEGHQKRFNKQIDKVYNGK 502  
ALQ99048.1 HSYKDRNLNAQQKVNTLSEGHQKRFNKQIDKVYNGK 502  
BAF77691.1 HSYKDRNLNAQQKVNTLSEGHQKRFNKQINKVYNGK 500  
AQD18904.1 HSYKDRNLNAQQKVNTLSEGHQKRFNKQINKVYNGK 500  
ABR51685.1 HSYKDRNLNAQQKVNTLSEGHQKRFNKQINKVYNGK 500  
ADC36978.1 HSYKDRNLNAQQKVNTLSEGHQKRFNKQINKVYNGK 500  
CCJ10583.1 HSYKDRNLNAQQKVNTLSEGHQKRFNKQINKVYNGK 500  
ADI97344.1 HSYKDRNLNAQQKVNTLSSGHQKRFNKQINKVYNGK 504  
ABD20992.1 HSYKDRINAQQKVNTLSEGHQKRFNKQINKVYNGK 508  
CBI48742.1 HSYKDRINAQQKVNTLSEGHQKRFNKQINKVYNGK 508  
AAW36412.1 HSYKDRINAQQKVNTLSEGHQKRFNKQINKVYNGK 508  
ELP41199.1 HSYKDRINAQQKVNTLSEGHQKRFNKQINKVYNGK 508  
AGO29164.1 HSYKDRNLNAQQKVNTLSEGHQKRFNKQINKVYNGK 509  
ADQ77852.1 HSYKDRNLNAQQKVNTLSAGHQKRFNKQINKVYNGK 502  
AIO20460.1 HSYKDRNLNAQQKVNTLSAGHQKRFNKQINKVYNGK 502  
AEW64854.1 HSYRDRNLNAQQKVNTLSEGHQKRFNKQINKVYNGK 514  
AGU54602.1 HSYKDRNLNAQQKVNTLSEGHQKRFNKQIDKVYNGK 506  
ADL22691.1 HSYKDRNLNAQQKVNTLSEGHQKRFNKQINKVYNGK 504

\*\*\*.\*\*\*.\*\*\*\*\* \*\*\*\*\*.\*\*\*\*\*
