# Supplementary material for: vhp Is a Fibrinogen-Binding Protein Related to vWbp in Staphylococcus aureus
Source: PubMed Central journal article supplement (PMC8406236; doi:10.1128/mbio.01167-21), 2021-08-03
Supplement: mbio.01167-21-sf002.pdf [file mbio.01167-21-sf002.pdf]

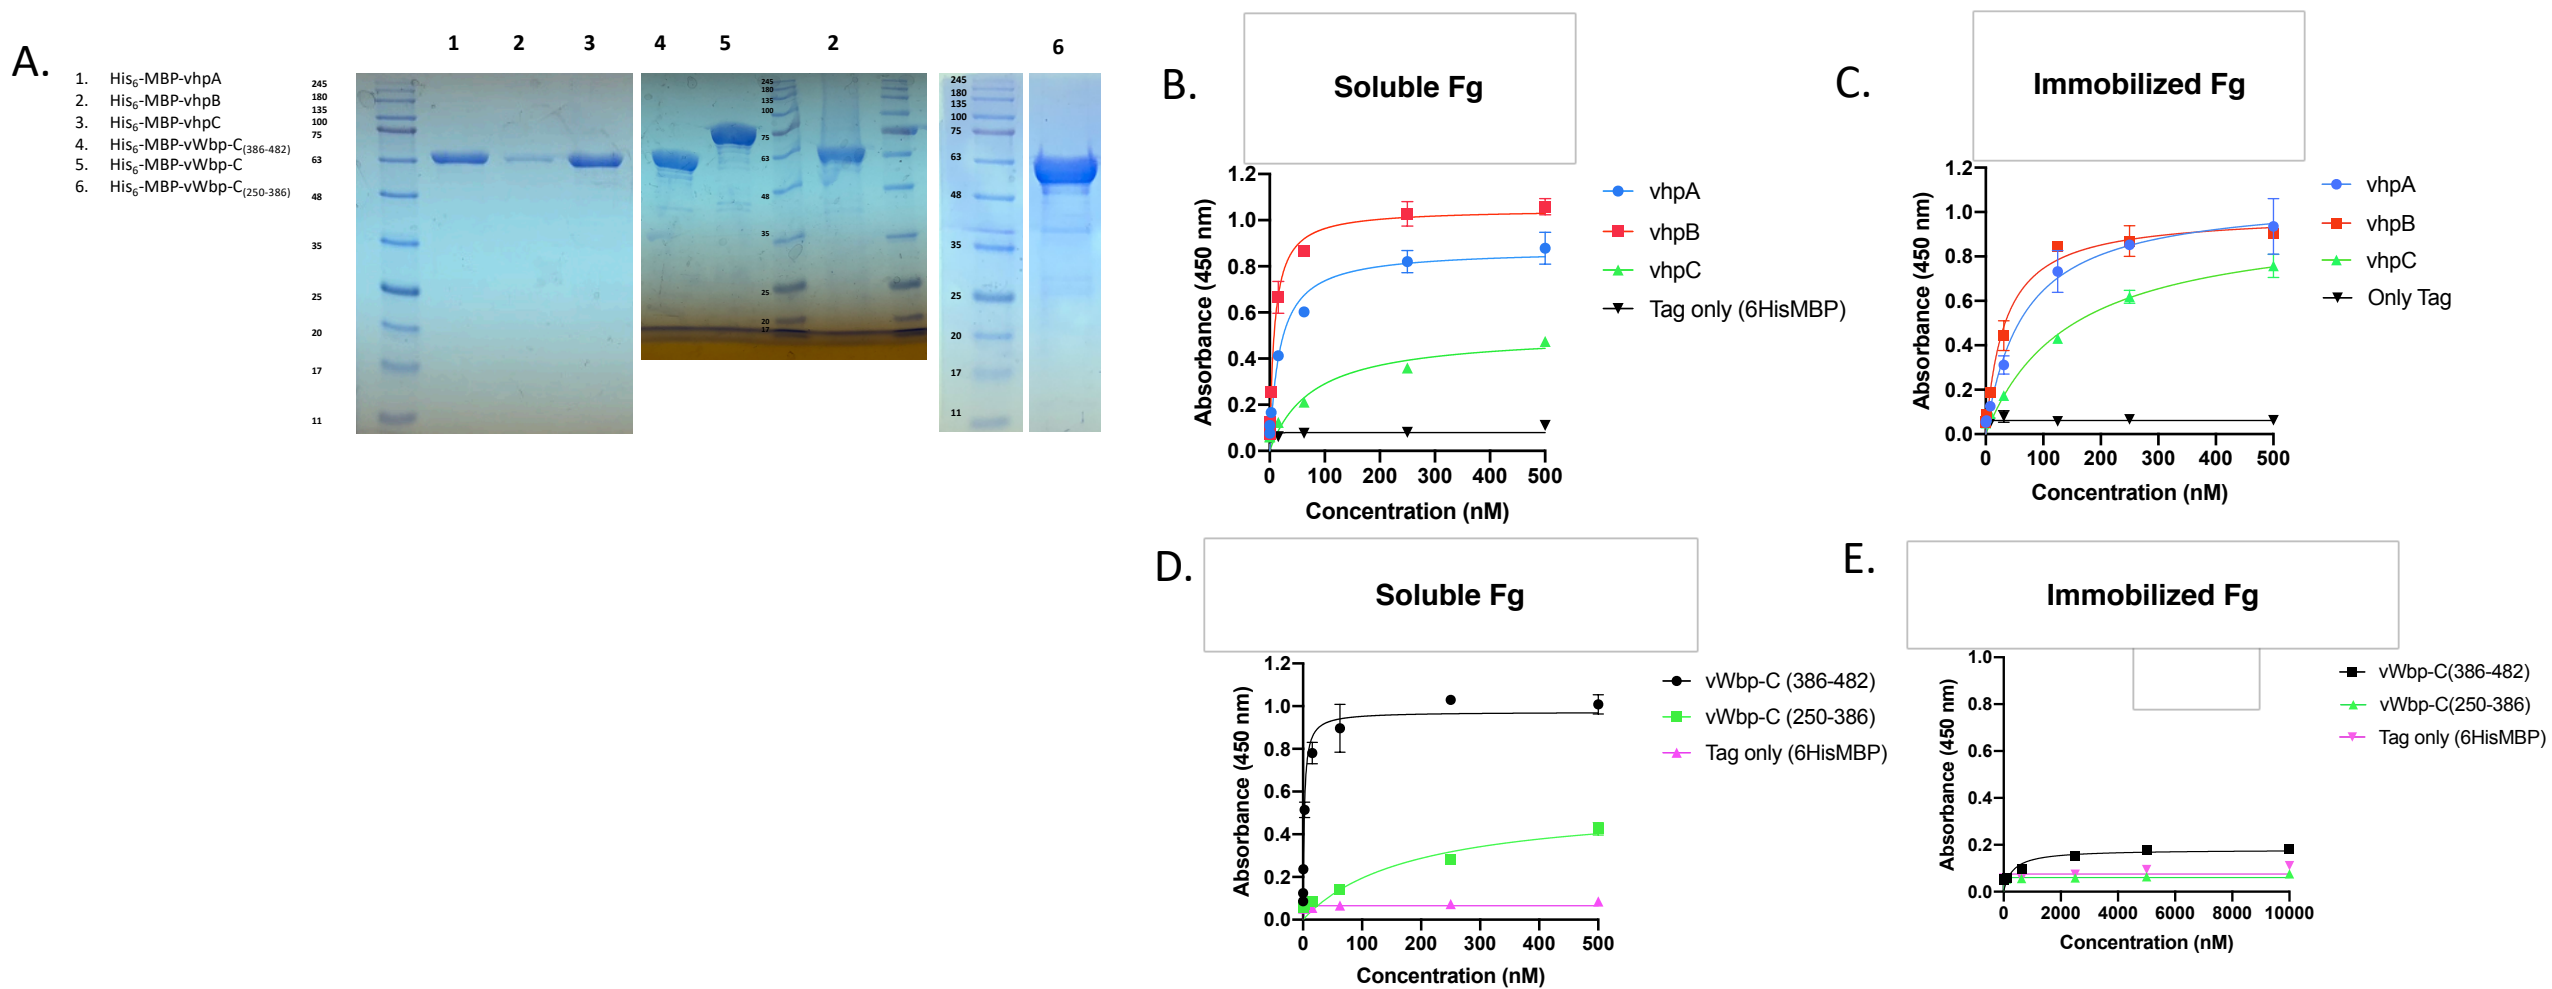

**Fig S2. Both vWbp-C<sub>(386-482)</sub> and vhp bind Fg.** (A) SDS-PAGE gel of vhp isoforms and vWbp-C constructs. (B) ELISA binding of soluble Fg to immobilized vhp isoforms (0.5  $\mu\text{g}/\text{well}$ ). (C) ELISA binding of vhp isoforms to immobilized Fg (0.5  $\mu\text{g}/\text{well}$ ). (D) ELISA binding of soluble Fg to immobilized vWbp-C constructs (0.5  $\mu\text{g}/\text{well}$ ). (E) ELISA binding of vWbp-C constructs binding to immobilized Fg (0.5  $\mu\text{g}/\text{well}$ ). Error bars, standard error of the mean (SEM). The graphs are representative of three independent experiments.
