# Supplementary material for: vhp Is a Fibrinogen-Binding Protein Related to vWbp in Staphylococcus aureus
Source: PubMed Central journal article supplement (PMC8406236; doi:10.1128/mbio.01167-21), 2021-08-03
Supplement: mbio.01167-21-st001.pdf [file mbio.01167-21-st001.pdf]

**Percent of amino acid identity of conserved C-terminal region of vWbp and vhp**

| <b>Proteins</b>                 | <b>vWbp (%)</b> | <b>vhpA (%)</b> | <b>vhpB (%)</b> | <b>vhpC (%)</b> |
|---------------------------------|-----------------|-----------------|-----------------|-----------------|
| <b>vWbp<sub>(404-482)</sub></b> | 100             | 58.23           | 67.09           | 54.43           |
| <b>vhpA<sub>(63-147)</sub></b>  | 58.23           | 100             | 70.37           | 87.06           |
| <b>vhpB<sub>(50-130)</sub></b>  | 67.09           | 70.37           | 100             | 70.37           |
| <b>vhpC<sub>(75-159)</sub></b>  | 54.43           | 87.06           | 70.37           | 100             |

<sup>a</sup>. Percent of amino acid identity of vWbp<sub>(404-482)</sub> - *S. aureus* Newman (AAK52333.1); vhpA- *S. aureus* N315 (BAB41978.1); vhpB- *S. aureus* USA300\_FPR3757 (ABD21761.1); vhpC-*S. aureus* TCH60 (ADQ77850.1).
